CORRECTION

# Correction: Safely Discharging Infants with Bronchiolitis from an Emergency Department: A Five Step Guide for Pediatricians

Fabiola Stollar, Alain Gervais, Constance Barazzone-Argiroffo

The third author's name was not hyphenated and the citation was incorrect. The correct name is: Constance Barazzone-Argiroffo.

The correct citation is: Stollar F, Gervais A, Barazzone-Argiroffo C (2016) Safely Discharging Infants with Bronchiolitis from an Emergency Department: A Five Step Guide for Pediatricians. PLoS ONE 11(9): e0163217. doi:[10.1371/journal.pone.0163217](https://doi.org/10.1371/journal.pone.0163217)

## Reference

1. Stollar F, Gervais A, Argiroffo CB (2016) Safely Discharging Infants with Bronchiolitis from an Emergency Department: A Five Step Guide for Pediatricians. PLoS ONE 11(9): e0163217. doi: [10.1371/journal.pone.0163217](https://doi.org/10.1371/journal.pone.0163217) PMID: [27690359](https://pubmed.ncbi.nlm.nih.gov/27690359/)

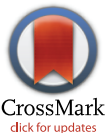

## OPEN ACCESS

**Citation:** Stollar F, Gervais A, Barazzone-Argiroffo C (2016) Correction: Safely Discharging Infants with Bronchiolitis from an Emergency Department: A Five Step Guide for Pediatricians. PLoS ONE 11(11): e0166256. doi:[10.1371/journal.pone.0166256](https://doi.org/10.1371/journal.pone.0166256)

**Published:** November 2, 2016

**Copyright:** © 2016 Stollar et al. This is an open access article distributed under the terms of the [Creative Commons Attribution License](https://creativecommons.org/licenses/by/4.0/), which permits unrestricted use, distribution, and reproduction in any medium, provided the original author and source are credited.
